# Supplementary material for: Multi-Gas Detection System Based on Non-Dispersive Infrared (NDIR) Spectral Technology
Source: MDPI journal article supplement (doi:10.3390/s22030836), 2022-01-22
Supplement: s1 [file s1]

Supporting information

# Multi-Gas Detection System Based on Non-Dispersive Infrared (NDIR) Spectral Technology

Manlin Xu <sup>1</sup>, Bo Peng <sup>2</sup>, Xiangyi Zhu <sup>1</sup> and Yongcai Guo <sup>1,\*</sup>

<sup>1</sup> Key Laboratory of Optoelectronic Technology and Systems of Ministry of Education, College of Optoelectronic Engineering, Chongqing University, Chongqing 400044, China; manlinxu@cqu.edu.cn (M.X.); XiangyiZhu@cqu.edu.cn (X.Z.)

<sup>2</sup> Liangjiang School of Artificial Intelligence, Chongqing University of Technology, Chongqing 401135, China; pengbo86@126.com

\* Correspondence: ycguo@cqu.edu.cn

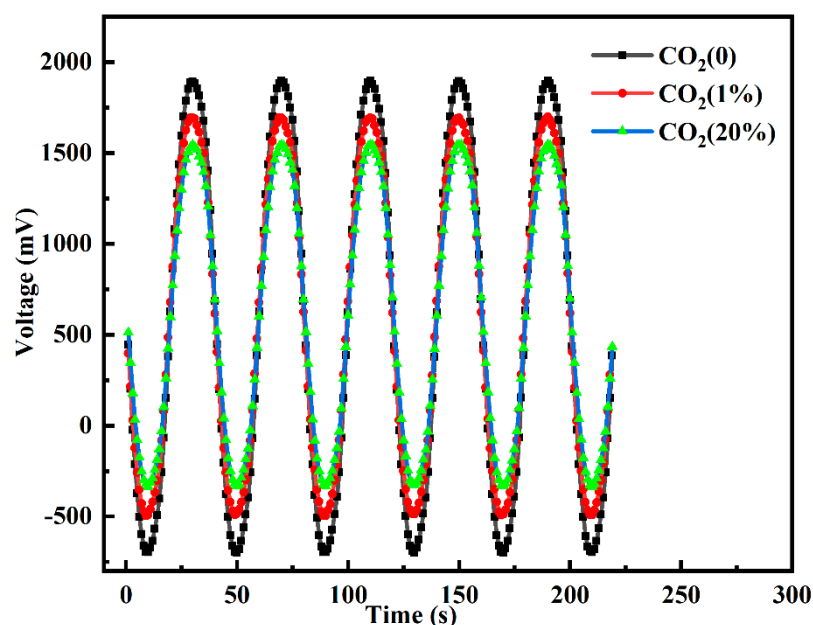

Figure S1. Relationship between voltage and sampling time.

Table S1. CO<sub>2</sub> experimental data.

| Truth concentration (%) | Voltage ratio | Truth concentration (%) | Voltage ratio | Truth concentration (%) | Voltage ratio |
|-------------------------|---------------|-------------------------|---------------|-------------------------|---------------|
| 0                       | 0.78929       | 6.5                     | 0.59776       | 13                      | 0.58428       |
| 0.5                     | 0.70779       | 7                       | 0.59457       | 13.5                    | 0.58433       |
| 1                       | 0.66766       | 7.5                     | 0.59225       | 14                      | 0.58293       |
| 1.5                     | 0.64489       | 8                       | 0.59244       | 14.5                    | 0.58192       |
| 2                       | 0.63075       | 8.5                     | 0.59154       | 15                      | 0.58187       |
| 2.5                     | 0.62145       | 9                       | 0.59169       | 15.5                    | 0.58206       |
| 3                       | 0.61496       | 9.5                     | 0.58979       | 16                      | 0.58194       |
| 3.5                     | 0.60983       | 10                      | 0.58698       | 16.5                    | 0.58111       |
| 4                       | 0.60687       | 10.5                    | 0.58672       | 17                      | 0.57962       |
| 4.5                     | 0.60422       | 11                      | 0.58719       | 17.5                    | 0.57975       |
| 5                       | 0.60207       | 11.5                    | 0.58532       | 18                      | 0.58063       |
| 5.5                     | 0.59809       | 12                      | 0.58554       | 18.5                    | 0.57893       |

|   |         |      |         |    |         |
|---|---------|------|---------|----|---------|
| 6 | 0.59874 | 12.5 | 0.58434 | 20 | 0.57733 |
|---|---------|------|---------|----|---------|

Table S2. CO experimental data.

| Truth concentration (%) | Voltage ratio | Truth concentration (%) | Voltage ratio | Truth concentration (%) | Voltage ratio |
|-------------------------|---------------|-------------------------|---------------|-------------------------|---------------|
| 0                       | 0.42071       | 9.7                     | 0.33531       | 5                       | 0.35832       |
| 0.3                     | 0.40761       | 10.2                    | 0.33353       | 5.5                     | 0.35913       |
| 0.7                     | 0.40038       | 10.7                    | 0.33023       | 6                       | 0.35365       |
| 1.2                     | 0.3919        | 11.2                    | 0.33012       | 6.5                     | 0.35103       |
| 1.7                     | 0.38343       | 11.7                    | 0.32792       | 7                       | 0.34695       |
| 2.2                     | 0.38137       | 12.2                    | 0.32837       | 7.5                     | 0.34761       |
| 2.7                     | 0.37327       | 12.7                    | 0.32553       | 8                       | 0.34581       |
| 3.2                     | 0.36888       | 13.2                    | 0.32229       | 8.5                     | 0.34256       |
| 3.7                     | 0.36442       | 13.7                    | 0.32118       | 9                       | 0.33952       |
| 4.2                     | 0.36046       | 14                      | 0.32129       | 9.5                     | 0.33748       |
| 4.7                     | 0.36083       | 0                       | 0.42395       | 10                      | 0.33577       |
| 5.2                     | 0.35555       | 0.5                     | 0.40448       | 10.5                    | 0.33492       |
| 5.7                     | 0.35251       | 1                       | 0.39661       | 11                      | 0.32785       |
| 6.2                     | 0.34679       | 1.5                     | 0.39143       | 11.5                    | 0.32956       |
| 6.7                     | 0.35111       | 2                       | 0.38446       | 12                      | 0.32624       |
| 7.2                     | 0.34794       | 2.5                     | 0.38422       | 12.5                    | 0.32482       |
| 7.7                     | 0.34647       | 3                       | 0.3756        | 13                      | 0.32405       |
| 8.2                     | 0.3417        | 3.5                     | 0.37221       | 13.5                    | 0.32819       |
| 8.7                     | 0.34062       | 4                       | 0.36798       | 14                      | 0.32196       |
| 9.2                     | 0.3393        | 4.5                     | 0.36593       |                         |               |

Table S3. Repeatability test I.

| Gas        | True concentration | Measurement concentration |      |      |      |      | Average value | Average deviation (%) |
|------------|--------------------|---------------------------|------|------|------|------|---------------|-----------------------|
| C3H8 (ppm) | 2000               | 2016                      | 2084 | 1986 | 1966 | 2084 | 2023          | 3.39                  |
|            |                    | 1985                      | 2169 | 2014 | 1976 | 1958 |               |                       |
| CO2(%)     | 2                  | 1.93                      | 1.99 | 1.88 | 1.86 | 1.98 | 1.91          | 2.90                  |
|            |                    | 1.88                      | 1.93 | 1.94 | 1.82 | 1.84 |               |                       |
| CO(%)      | 2                  | 1.83                      | 1.78 | 1.92 | 1.76 | 1.86 | 1.79          | 4.50                  |
|            |                    | 1.80                      | 1.68 | 1.86 | 1.62 | 1.74 |               |                       |

Table S4. Repeatability test II.

| Gas     | True concentration | Measurement concentration |      |      |      |      | Average value | Average deviation (%) |
|---------|--------------------|---------------------------|------|------|------|------|---------------|-----------------------|
| CH(ppm) | 2500               | 2599                      | 2380 | 2472 | 2540 | 2556 | 2538          | 3.81                  |
|         |                    | 2585                      | 2391 | 2674 | 2600 | 2586 |               |                       |
| CO2(%)  | 1.2                | 1.09                      | 1.09 | 1.11 | 1.11 | 1.09 | 1.09          | 1.04                  |
|         |                    | 1.10                      | 1.07 | 1.09 | 1.09 | 1.10 |               |                       |
| CO(%)   | 1                  | 0.81                      | 0.87 | 0.80 | 0.85 | 0.80 | 0.84          | 4.44                  |
|         |                    | 0.86                      | 0.90 | 0.91 | 0.85 | 0.78 |               |                       |

**Table S5.** Repeatability test III.

| Gas                                 | True concentration | Measurement concentration |      |      |      |      | Average value | Average deviation (%) |
|-------------------------------------|--------------------|---------------------------|------|------|------|------|---------------|-----------------------|
|                                     |                    | 3565                      | 3454 | 3409 | 3509 | 3417 |               |                       |
| C <sub>3</sub> H <sub>8</sub> (ppm) | 3500               | 3590                      | 3485 | 3408 | 3519 | 3506 | 3486          | 1.83                  |
| CO <sub>2</sub> (%)                 | 0.7                | 0.59                      | 0.58 | 0.58 | 0.58 | 0.58 | 0.58          | 1.26                  |
| CO(%)                               | 2                  | 1.62                      | 1.75 | 1.87 | 1.69 | 1.79 | 1.77          | 4.37                  |

**Table S6.** Stability test.

| Gas                                 | Measurement concentration |      |      |      |      |      |      |      |      |       | Average value | Stability (%) |
|-------------------------------------|---------------------------|------|------|------|------|------|------|------|------|-------|---------------|---------------|
|                                     | 1day                      | 2day | 3day | 4day | 5day | 6day | 7day | 8day | 9day | 10day |               |               |
| C <sub>3</sub> H <sub>8</sub> (ppm) | 2560                      | 2526 | 2595 | 2521 | 2520 | 2515 | 2513 | 2533 | 2395 | 2646  | 2532          | -2.11         |
| CO <sub>2</sub> (%)                 | 1.92                      | 1.87 | 1.93 | 1.91 | 1.95 | 1.86 | 1.97 | 1.96 | 1.92 | 2.01  | 1.93          | -0.72         |
| CO(%)                               | 1.87                      | 1.75 | 2.04 | 1.66 | 1.63 | 1.67 | 2.05 | 1.93 | 1.97 | 1.77  | 1.83          | -2.63         |
